# Supplementary material for: Biomonitoring of Exposure to Urban Pollutants and Oxidative Stress during the COVID-19 Lockdown in Rome Residents
Source: MDPI journal article supplement (doi:10.3390/toxics10050267), 2022-05-21
Supplement: s1 [file s1]

# Effect of the 2020 lockdown during Covid-19 pandemic on the biomarkers of exposure to urban pollutants and oxidative stress in Rome residents

Flavia Buonauro<sup>1</sup>, Francesca Borra<sup>1</sup>, Daniela Pigini<sup>2</sup>, Enrico Paci<sup>2</sup>, Mariangela Spagnoli<sup>2</sup>, Maria Luisa Astolfi<sup>1</sup>, Ottavia Giampaoli<sup>3,4</sup>, Fabio Sciubba<sup>3,4</sup>, Alfredo Miccheli<sup>3,4</sup>, Silvia Canepari<sup>3</sup>, Carla Ancona<sup>5</sup> and Giovanna Tranfo<sup>2,\*</sup>

<sup>1</sup> Department of Chemistry, Sapienza University of Rome, Italy

<sup>2</sup> Department of Occupational and Environmental Medicine, Epidemiology and Hygiene, INAIL, Monte Porzio Catone, Rome, Italy

<sup>3</sup> Department of Environmental Biology, Sapienza University of Rome, Italy

<sup>4</sup> NMR-based Metabolomics Laboratory (NMLab), Sapienza University of Rome, Italy

<sup>5</sup> Department of Epidemiology, Lazio Regional Health Service, Rome, Italy

\* Correspondence: g.tranfo@inail.it; Tel: +39-694181436

**Supplementary Table S1.** Descriptive statistic of 28 urinary elements (µg/g creatinine) on 29 pairs of matched samples

| Elements | year 2020        |                  |             |                 |         |        |         | year 2021   |                 |         |        |         | p-value <sup>d</sup> |
|----------|------------------|------------------|-------------|-----------------|---------|--------|---------|-------------|-----------------|---------|--------|---------|----------------------|
|          | LOD <sup>a</sup> | LOQ <sup>b</sup> | mean        | SD <sup>c</sup> | median  | min    | max     | mean        | SD <sup>c</sup> | median  | min    | max     |                      |
| As       | 2                | 8                | 122         | 289             | 36      | 4      | 1524    | 54          | 73              | 23      | 2      | 311     | ns                   |
| B        | 30               | 120              | <b>1650</b> | <b>910</b>      | 1390    | 377    | 4220    | <b>2150</b> | <b>1500</b>     | 1740    | 736    | 8060    | *                    |
| Ba       | 3                | 9                | 4.9         | 3.3             | 3.7     | 0.6    | 13.2    | 4.9         | 4.7             | 3.7     | 0.5    | 25.1    | ns                   |
| Be       | 0.02             | 0.08             | <0.02       | -               | <0.02   | <0.02  | <0.02   | <0.02       | -               | <0.02   | <0.02  | <0.02   | nd                   |
| Bi       | 0.01             | 0.03             | 0.02        | 0.05            | 0.01    | <0.01  | 0.25    | <0.01       | -               | <0.01   | <0.01  | 0.03    | ns                   |
| Ca       | 500              | 2000             | 198000      | 120000          | 172000  | 36086  | 504000  | 175000      | 120000          | 147000  | 29300  | 582000  | ns                   |
| Cd       | 0.04             | 0.1              | 0.22        | 0.16            | 0.20    | <0.04  | 0.69    | 0.24        | 0.16            | 0.20    | <0.04  | 0.70    | ns                   |
| Co       | 0.05             | 0.2              | <b>0.56</b> | <b>0.45</b>     | 0.37    | 0.09   | 1.85    | <b>0.87</b> | <b>0.57</b>     | 0.79    | 0.12   | 2.90    | *                    |
| Cr       | 0.2              | 0.6              | 5.2         | 3.5             | 4.1     | 1.0    | 15.6    | 5.7         | 4.6             | 4.2     | 1.2    | 24.5    | ns                   |
| Cs       | 0.01             | 0.03             | 19          | 21              | 13      | 3      | 94      | 25          | 29              | 14      | 4      | 105     | ns                   |
| Cu       | 0.4              | 1                | <b>30</b>   | <b>18</b>       | 24      | 8      | 90      | <b>40</b>   | <b>27</b>       | 29      | 16     | 119     | *                    |
| Fe       | 1                | 4                | 18          | 12              | 13      | 3      | 48      | 18.6        | 8.5             | 16      | 7      | 38      | ns                   |
| Hg       | 0.03             | 0.09             | 0.62        | 0.41            | 0.49    | 0.13   | 1.71    | 0.69        | 0.48            | 0.51    | 0.14   | 2.14    | ns                   |
| K        | 700              | 2500             | 1320000     | 830000          | 1010000 | 158000 | 3780000 | 1580000     | 900000          | 1310000 | 348000 | 4400000 | ns                   |
| Li       | 0.04             | 0.1              | 27          | 37              | 13      | 3      | 182     | 22          | 19              | 14      | 3      | 71      | ns                   |
| Mg       | 5                | 20               | 92820       | 43900           | 81100   | 37900  | 225000  | 90600       | 45200           | 83200   | 35300  | 241000  | ns                   |
| Mn       | 5                | 20               | <5          | -               | <5      | <5     | <5      | <5          | -               | <5      | <5     | <5      | nd                   |
| Mo       | 0.6              | 2                | 53          | 44              | 39      | 11     | 178     | 44          | 34              | 38      | 7      | 148     | ns                   |
| Na       | 30               | 90               | 2550000     | 1900000         | 1860000 | 547000 | 950000  | 2460000     | 1700000         | 2080000 | 51700  | 8760000 | ns                   |
| Ni       | 0.6              | 2                | 6.2         | 3.4             | 5.5     | 1.7    | 17.8    | 6.5         | 3.1             | 5.7     | 2.7    | 15.5    | ns                   |
| Pb       | 0.04             | 0.1              | 1.2         | 1.1             | 0.8     | 0.2    | 4.4     | 1.0         | 0.5             | 1.0     | 0.3    | 2.3     | ns                   |
| Rb       | 0.07             | 0.2              | 967         | 520             | 857     | 238    | 2050    | 1160        | 680             | 995     | 256    | 2740    | ns                   |
| Sb       | 0.01             | 0.04             | <b>6.9</b>  | <b>5.1</b>      | 4.7     | 0.8    | 21.7    | <b>8.9</b>  | <b>5.7</b>      | 7.6     | 1.2    | 25.6    | *                    |

|           |       |       |     |     |     |     |      |     |     |     |     |      |    |
|-----------|-------|-------|-----|-----|-----|-----|------|-----|-----|-----|-----|------|----|
| <b>Se</b> | 1     | 3     | 34  | 16  | 33  | 15  | 79   | 33  | 16  | 29  | 16  | 76   | ns |
| <b>Sn</b> | 0.04  | 0.1   | 0.8 | 2.0 | 0.3 | 0.1 | 10.4 | 0.4 | 0.2 | 0.4 | 0.1 | 1.0  | ns |
| <b>Sr</b> | 0.5   | 2     | 199 | 100 | 168 | 59  | 538  | 195 | 120 | 184 | 40  | 619  | ns |
| <b>Te</b> | 0.2   | 0.5   | 15  | 33  | 5   | 0.4 | 179  | 13  | 16  | 7   | 2   | 76   | ns |
| <b>Tl</b> | 0.001 | 0.005 | 6.5 | 7.5 | 4.2 | 0.2 | 26.6 | 9.9 | 9.7 | 6.4 | 0.6 | 39.5 | ns |
| <b>V</b>  | 0.3   | 1     | 1.6 | 2.4 | 0.3 | 0.3 | 9.0  | 0.9 | 1.5 | 0.3 | 0.3 | 6.5  | ns |
| <b>Zn</b> | 3     | 9     | 345 | 200 | 315 | 88  | 1160 | 394 | 200 | 323 | 91  | 791  | ns |

<sup>a</sup> LOD, limit of determination

<sup>b</sup> LOQ, limit of quantification

<sup>c</sup> SD, standard deviation

<sup>d</sup> Paired Student's t test was applied: "nd" = not determined; "ns" = not significant at  $p > 0.05$ ; "\*" = significant at  $p < 0.05$ . Numbers in bold in the same row indicate significant differences ( $p < 0.05$ ).

**Supplementary Figure S1.** <sup>1</sup>H NMR spectrum of urine

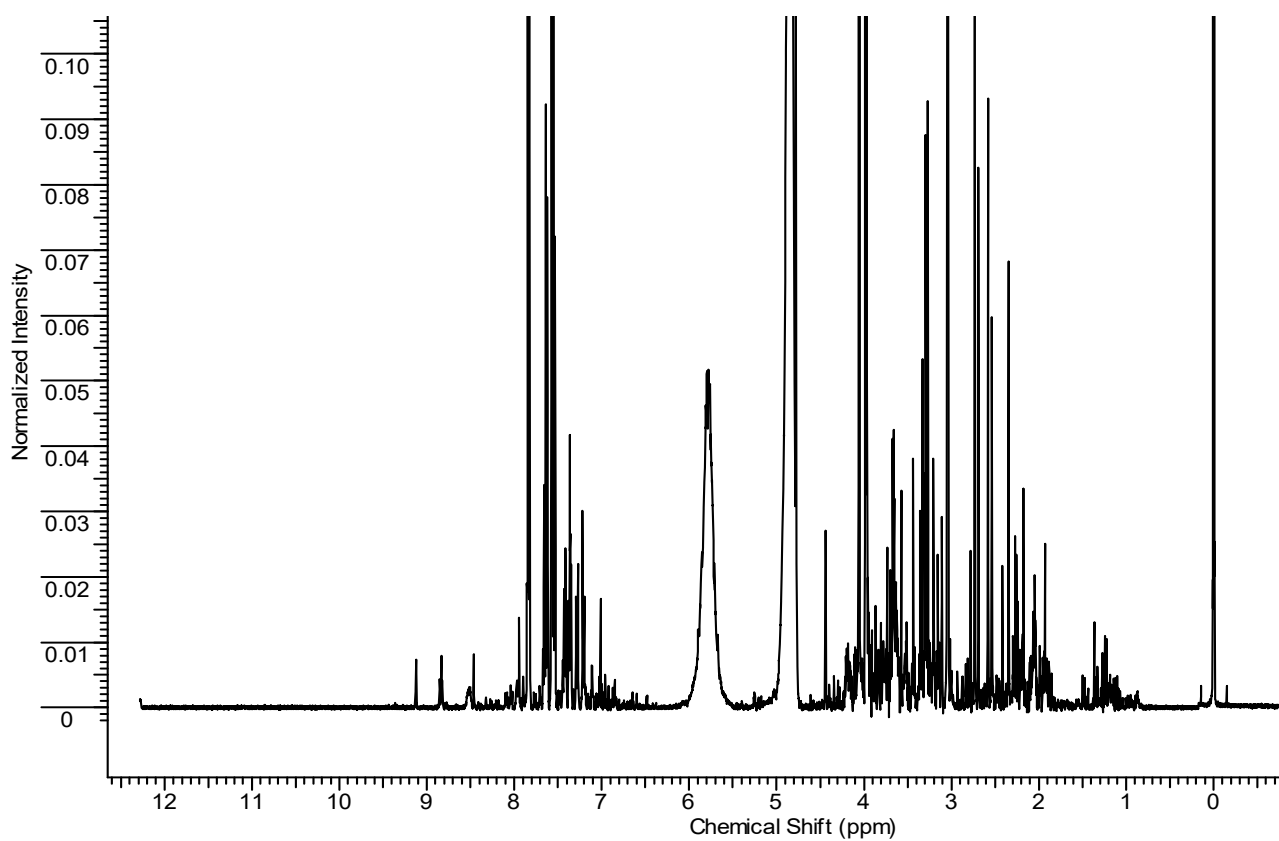

**Supplementary Figure S2.**  $^1\text{H}$  NMR spectrum of urine, spectral region 1 – 4 ppm.

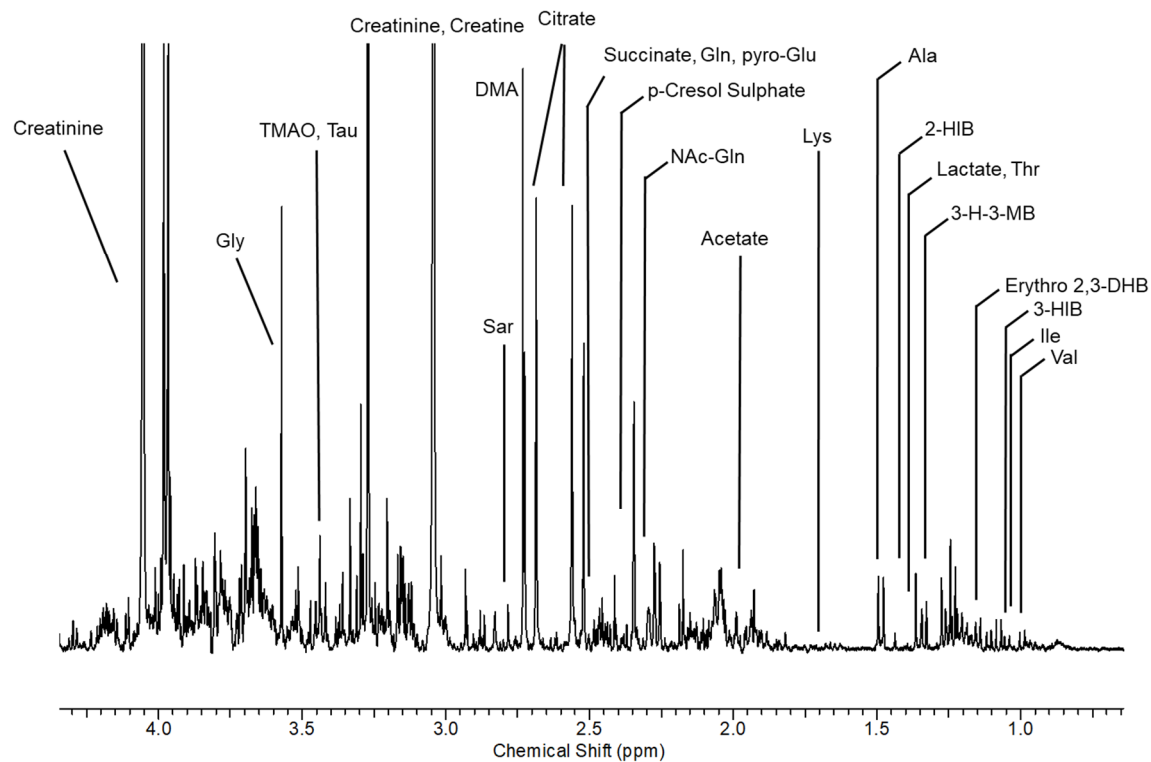

**Supplementary Figure S3.**  $^1\text{H}$  NMR spectrum of urine, spectral region 6.5 – 9.5 ppm.

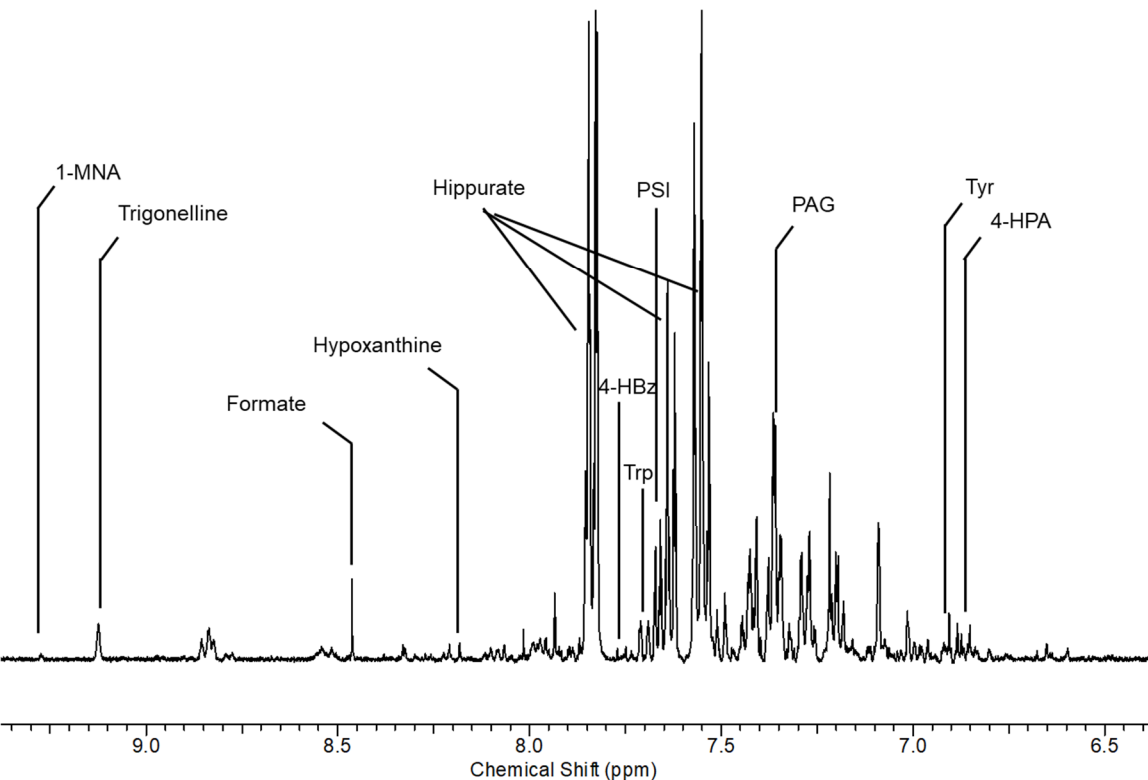

**Supplementary Table S2.** <sup>1</sup>H NMR assignment of urinary metabolites.

bs: broad singlet; d: doublet; dd: double doublet; m: multiplet; pd: pseudo doublet; q: quartet; s: singlet, t: triplet.

| Metabolite                                         | Structure                                                                           | <sup>1</sup> H δ ppm                 | Multiplicity          | Assignment                                                                     |
|----------------------------------------------------|-------------------------------------------------------------------------------------|--------------------------------------|-----------------------|--------------------------------------------------------------------------------|
| 1. Valine (Val)                                    | 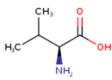   | 0.99<br>1.05                         | d<br>d                | CH <sub>3</sub><br>CH <sub>3</sub> '                                           |
| 2. Isoleucine (Ile)                                |    | 0.92<br>1.01<br>1.99                 | t<br>d                | CH <sub>3</sub><br>CH <sub>3</sub><br>CH                                       |
| 3. 3-Hydroxyisobutyrate (3-HIB)                    |    | 1.07<br>2.49<br>3.54<br>3.71         | d                     | CH <sub>3</sub>                                                                |
| 4. Erythro-2,3-dihydroxybutyrate (Erythro-2,3-DHB) |  | 1.11<br>4.19                         | d<br>m                | CH <sub>3</sub><br>CH                                                          |
| 5. 3-Hydroxy-3-methylbutyrate (3-H-3-MB)           |  | 1.27                                 | s                     | CH <sub>3</sub> , CH <sub>3</sub> '                                            |
| 6. Lysine (Lys)                                    |  | 1.48<br>1.71<br>1.89<br>3.02<br>3.74 | m<br>m<br>m<br>m<br>m | CH <sub>2</sub><br>CH <sub>2</sub><br>CH <sub>2</sub><br>CH <sub>2</sub><br>CH |
| 7. Lactate                                         |  | 1.33<br>4.11                         | d<br>q                | CH <sub>3</sub><br>CH                                                          |
| 8. Threonine (Thr)                                 |  | 1.33<br>3.59<br>4.26                 | d<br>d<br>m           | CH <sub>3</sub><br>α-CH<br>β-CH                                                |
| 9. 2-Hydroxyisobutyrate (2-HIB)                    |  | 1.36                                 | s                     | CH <sub>3</sub> , CH <sub>3</sub> '                                            |
| 10. Alanine (Ala)                                  |  | 1.49<br>3.78                         | d<br>q                | CH <sub>3</sub><br>α-CH                                                        |
| 11. Acetate                                        |  | 1.93                                 | s                     | CH <sub>3</sub>                                                                |

|                                    |                                                                                     |                                             |                                        |                                                              |
|------------------------------------|-------------------------------------------------------------------------------------|---------------------------------------------|----------------------------------------|--------------------------------------------------------------|
| 12. N-acetylglutamine (NAcGln)     | 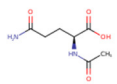   | 1.95<br>2.12<br><b>2.27</b><br>4.18<br>7.97 | <b>m</b><br><br><br>bs                 | <b>CH<sub>2</sub></b>                                        |
| 13. Pyroglutamate (pyro-Glu)       |    | 2.03<br><b>2.40</b><br>2.50<br>4.19         | <b>m</b><br><b>m</b><br><b>m</b><br>dd | <b>CH<sub>2</sub></b><br><b>CH</b><br><b>CH</b><br><b>CH</b> |
| 14. Glutamine (Gln)                |    | 2.13<br><b>2.46</b><br>3.78                 | <b>m</b><br><b>m</b><br>t              | <b>CH<sub>2</sub></b><br><b>CH<sub>2</sub></b><br><b>CH</b>  |
| 15. p-Cresol sulphate              |    | <b>2.35</b><br>7.21<br>7.28                 | <b>bs</b><br>dd<br>dd                  | <b>CH<sub>3</sub></b><br><b>CH, CH'</b><br><b>CH, CH'</b>    |
| 16. Succinate                      |    | <b>2.41</b>                                 | <b>s</b>                               | <b>CH<sub>2</sub>, CH<sub>2</sub>'</b>                       |
| 17. Citrate                        |   | <b>2.54</b><br>2.69                         | <b>d</b><br>d                          | <b>CH, CH'</b><br><b>CH, CH'</b>                             |
| 18. Dimethylamine (DMA)            |  | <b>2.73</b>                                 | <b>s</b>                               | <b>CH<sub>3</sub>, CH<sub>3</sub>'</b>                       |
| 19. Sarcosine (Sar)                |  | <b>2.78</b>                                 | <b>s</b>                               | <b>CH<sub>3</sub></b>                                        |
| 20. Creatine                       |  | <b>3.05</b><br>3.95                         | <b>s</b><br>s                          | <b>CH<sub>3</sub></b><br><b>CH<sub>2</sub></b>               |
| 21. Creatinine                     |  | 3.03<br><b>4.05</b>                         | s<br><b>s</b>                          | <b>CH<sub>3</sub></b><br><b>CH<sub>2</sub></b>               |
| 22. Trimethylamine N-Oxide (TMAO)  |  | <b>3.27</b>                                 | <b>s</b>                               | <b>CH<sub>3</sub></b><br><b>CH<sub>2</sub></b>               |
| 23. Taurine (Tau)                  |  | 3.27<br><b>3.43</b>                         | t<br><b>t</b>                          | <b>CH<sub>2</sub></b><br><b>CH<sub>2</sub></b>               |
| 24. Glycine (Gly)                  |  | <b>3.57</b>                                 | <b>s</b>                               | <b>CH<sub>2</sub></b>                                        |
| 25. 4-Hydroxyphenylacetate (4-HPA) |  | <b>6.87</b><br>7.17                         | <b>dd</b><br>dd                        | <b>CH, CH</b><br><b>CH, CH</b>                               |

|                                              |                                                                                     |                                               |                                |                                                    |
|----------------------------------------------|-------------------------------------------------------------------------------------|-----------------------------------------------|--------------------------------|----------------------------------------------------|
| 26. Tyrosine (Tyr)                           | 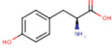   | <b>6.90</b><br>7.18                           | <b>dd</b><br>dd                | <b>2-CH,6-CH</b><br>3-CH,5-CH                      |
| 27. 4-Hydroxybenzoate (4-HBz)                |    | 6.97<br><b>7.76</b>                           | dd<br><b>dd</b>                | 2-CH,6-CH<br><b>3-CH,5-CH</b>                      |
| 28. Tryptophan (Trp)                         |    | 7.20<br>7.27-<br>7.29-<br><b>7.50</b><br>7.70 | -<br>-<br>-<br><b>pd</b><br>pd | 3-CH<br>2-CH<br><br><b>5-CH</b><br>4-CH            |
| 29. Phenylacetylglycine (PAG)                |    | <b>7.36</b><br>7.39<br>7.42                   | <b>m</b><br>m<br>m             | 3,5-CH<br>4-CH<br>2,6-CH                           |
| 30. Hippurate (Hipp)                         |    | 3.97<br><b>7.55</b><br>7.64<br>7.83           | d<br><b>m</b><br>m<br>m        | CH2<br><b>3,5-CH</b><br>4-CH<br>2,6-CH             |
| 31. Pseudouridine (PSI)                      |   | <b>7.67</b>                                   | <b>bs</b>                      | <b>CH</b>                                          |
| 32. Hypoxanthine (HX)                        |  | <b>8.19</b><br>8.21                           | s<br>s                         | 2-CH<br>7-CH                                       |
| 33. N1-Methyl-2-pyridone-5-carboxamide (2PY) |  | 3.64<br>6.67<br>7.98<br><b>8.33</b>           | s<br>d<br>d<br><b>dd</b>       | N-CH <sub>3</sub><br>3-CH<br>4-CH<br><b>6-CH</b>   |
| 34. Formate                                  |  | <b>8.46</b>                                   | <b>s</b>                       | <b>CH</b>                                          |
| 35. U01                                      |                                                                                     | 8.06<br>8.54<br><b>8.78</b>                   | <br><br><b>d</b>               | <br><br><b>6-CH</b>                                |
| 36. Trigonelline (Trig)                      |  | 4.44<br>8.08<br>8.84<br><b>9.12</b>           | s<br>m<br>m<br><b>s</b>        | N-CH <sub>3</sub><br>5-CH<br>4,6-CH<br><b>2-CH</b> |
| 37. 1-MNA                                    |  | 8.17<br>8.89<br>8.96<br><b>9.28</b>           | t<br>d<br>d<br><b>s</b>        | 5-CH<br>4-CH<br>6-CH<br><b>2-CH</b>                |
